# Supplementary material
Source: Springer Nature journal article supplement (https://www.springermedizin.de/resource/supplementary/12879_2011_1733_MOESM1_ESM.pdf/9443458)

**a.****TUTUILA**

0 2.5 5 km

Pago Pago

Faga'alu

AUNU'U

Tafuna

Leone

Population density

Low

High

Ofu

Olosega

Ta'u

0 5 km

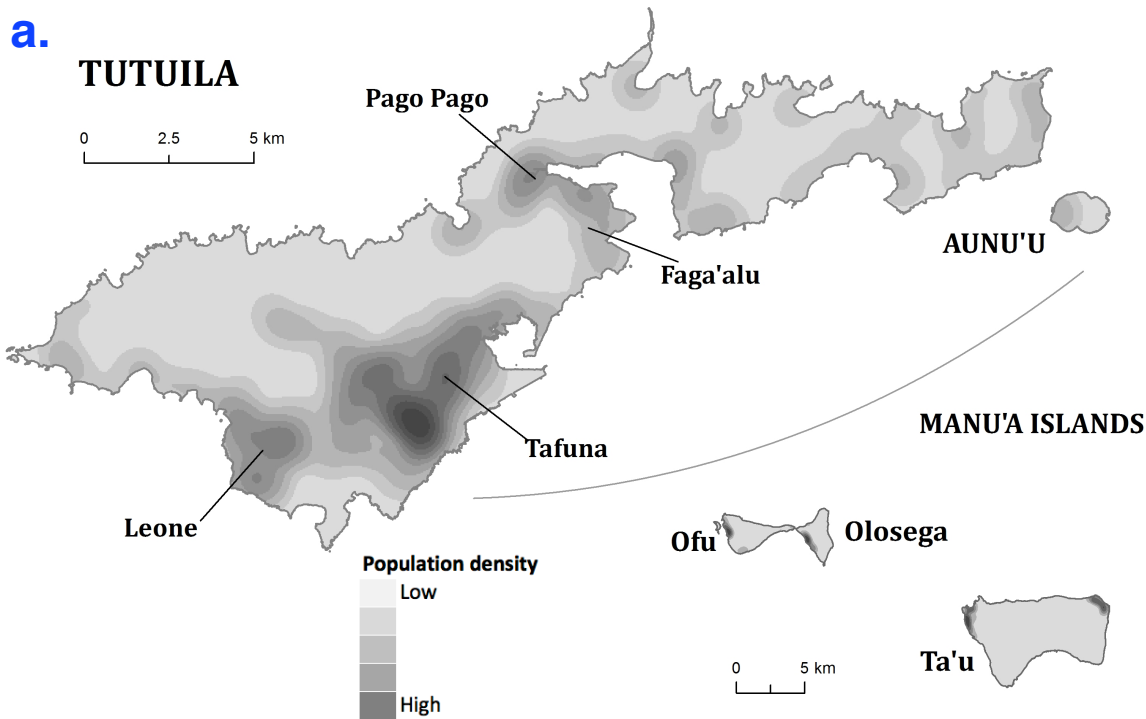**b.**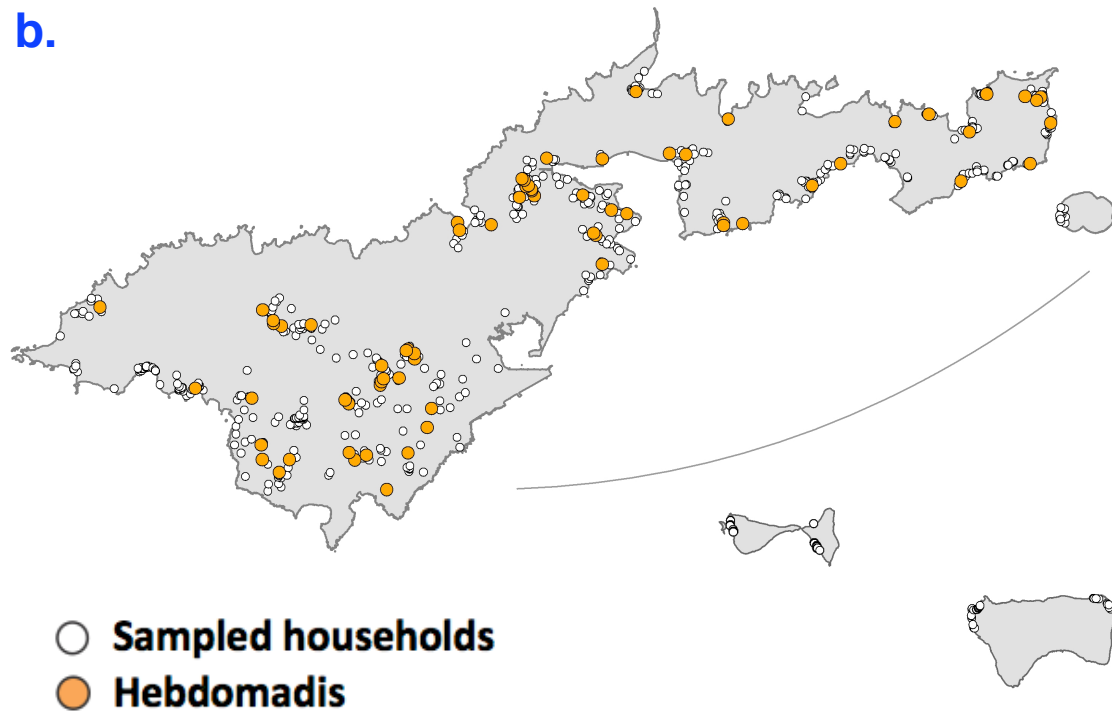**c.**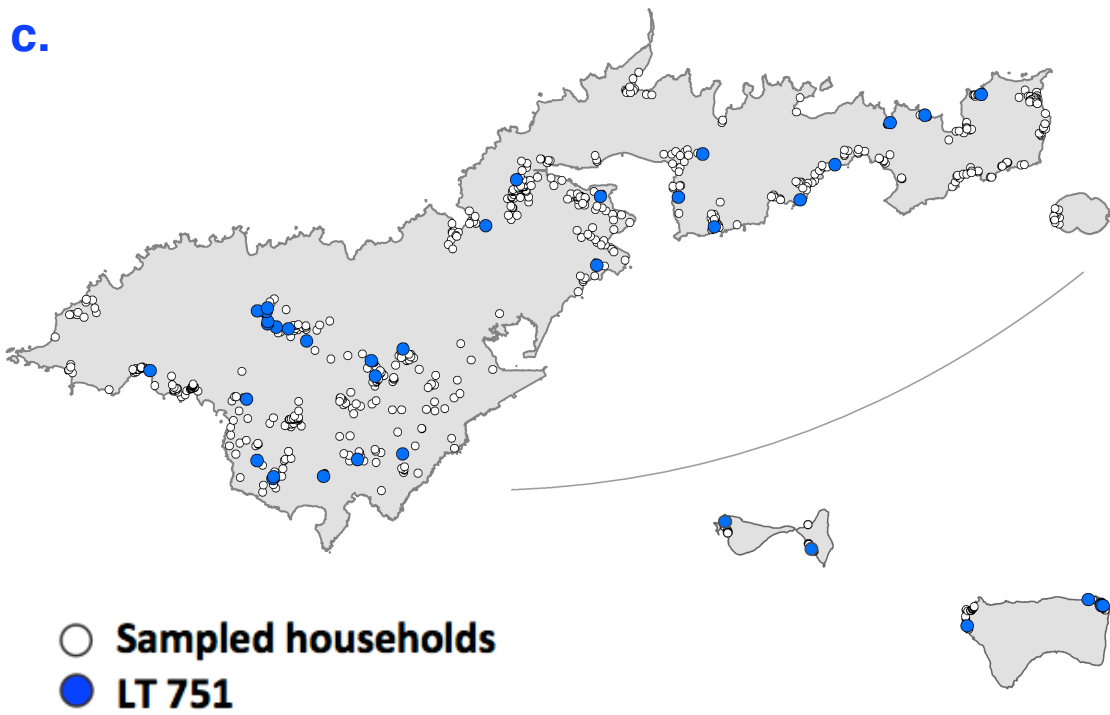**d.**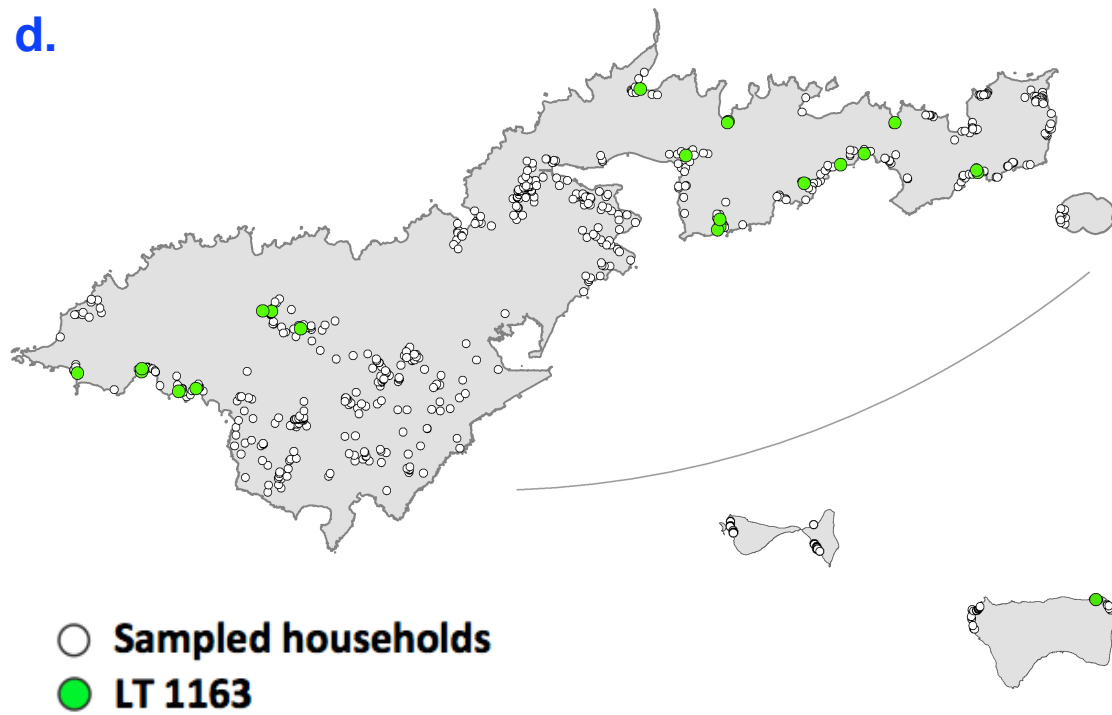

Supplement: MOESM1 [file 9443458]
